# Supplementary material for: PGE2 activates EP4 in subchondral bone osteoclasts to regulate osteoarthritis
Source: PubMed Central journal article supplement (PMC8904489; doi:10.1038/s41413-022-00201-4), 2022-03-09
Supplement: 41413_2022_201_MOESM2_ESM.pdf [file 41413_2022_201_MOESM2_ESM.pdf]

1 **Supplemental Figure Legend**

2 **Supplemental Figure 1. PGE2 regulates migration and osteoclast differentiation**

3 (A) The protein expression levels of EP2 and EP4 in control (Ctrl, n = 3) and human  
4 subchondral bone of OA patients (n = 17). The experiment was performed in three  
5 biological replicates.

6 (B) PGE2 regulated osteoclast migration. Representative images of the migrated  
7 BMMs, stimulated with 10 ng/ml M-CSF, 50 ng/ml RANKL and different  
8 concentrations of PGE2, from WT mice were photographed (left) and quantified (right).  
9 Error bars are mean  $\pm$  s.d. \* $P < 0.05$ , and \*\*\* $P < 0.01$ , ns, not significant by one-way  
10 ANOVA followed by Tukey's t-tests. The experiment was performed in three biological  
11 replicates.

12 (C) PGE2 regulated osteoclast differentiation. Representative images of the  
13 differentiated osteoclast cells were photographed (left) and quantified (right). Error bars  
14 are mean  $\pm$  s.d. \* $P < 0.05$ , and \*\*\* $P < 0.01$ , ns, not significant by one-way ANOVA  
15 followed by Tukey's t-tests. The experiment was performed in three biological  
16 replicates.

17

18 (D) The cytotoxicity of PGE2 on primary cultured BMM cells. Primary cultured BMMs  
19 were treated with 10 ng/ml M-CSF and indicated concentrations of PGE2 for 48 hours.  
20 IC<sub>50</sub> values were calculated by GraphPad Prism 8.0 software. The experiment was  
21 performed in three biological replicates.

22 (E) Confirmation of gene knockout for *EP2* and *EP4* in BMMs. Western blotting was

23 used to validate the protein expression of EP2 and EP4 in *EP2<sup>KO</sup>* and *EP4<sup>LysM</sup>*  
24 respectively, compared to the corresponding littermate controls of *EP2<sup>WT</sup>* and *EP4<sup>fl/fl</sup>*.  
25 (F) EP2 and EP4 antagonists inhibit PGE2 induced migration and osteoclast  
26 differentiation. BMMs from WT were used to generate osteoclasts by stimulating with  
27 10 ng/ml M-CSF and 50 ng/ml RANKL, and treated EP2 antagonist PF-04418948 (2  
28  $\mu$ M) or EP4 antagonist Grapiprant (10  $\mu$ M). Representative image of cells from  
29 transwell migration assay (Transwell), and osteoclasts differentiation assay (TRAP  
30 staining) (left), and the corresponding quantitative analysis (right). Error bars are mean  
31  $\pm$  s.d. \* $P < 0.05$ , \*\* $P < 0.01$  and \*\*\* $P < 0.01$  by one-way ANOVA followed by Tukey's  
32 t-tests. Scale bars, 50  $\mu$ m. The experiment was performed in three biological replicates.

33

34 **Supplemental Figure 2. EP2 deletion had little effect on OA progression in a**  
35 **murine model of OA**

36 (A) Genotyping validation of EP2 knockout in *EP2<sup>KO</sup>* mice compared to *EP2<sup>WT</sup>* and  
37 littermate. The *EP2<sup>KO</sup>* band size is 300bp and the *EP2<sup>WT</sup>* band size is 165bp.

38 (B and C) Representative 3D reconstructed microCT images, hematoxylin and eosin  
39 (H&E) and Safranin O-Fast green (S.O.) staining of sagittal sections of articular  
40 cartilage of *EP2<sup>WT</sup>* and *EP2<sup>KO</sup>* mice 2 weeks (B) and 8 weeks (C) post ACLT surgery.

41 Quantitative analysis of structural parameters of subchondral bone including Trabecular  
42 pattern factor (Tb.Pf), Trabecular separation (Tb.Sp), Percent bone volume (BV/TV)  
43 are presented alongside. Error bars are mean  $\pm$  s.d. Two-way ANOVA followed by  
44 Tukey's t-tests.  $n = 6$  for each group. Scale bars, 1 mm (microCT), 50  $\mu$ m (H&E), 50

45  $\mu\text{m}$  (S.O.) and. 50  $\mu\text{m}$  (TRAP).

46

47 **Supplemental Figure 3. *EP4* deletion in osteoclasts inhibits OA progression in a**  
48 **murine model of OA (refer to Fig. 2).**

49 (A) Genotyping validation of *EP4* knockout in *EP4<sup>LysM</sup>* mice *EP4<sup>fl/fl</sup>* littermate. The cre  
50 band size is 700bp (left) and the flox band size is 439bp (right).

51 (B) Representative 3D reconstructed microCT images, hematoxylin and eosin (H&E)  
52 and Safranin O-Fast green (S.O.) staining of sagittal sections of articular cartilage of  
53 *EP4<sup>fl/fl</sup>* or littermate *EP4<sup>LysM</sup>* mice 2 weeks after ACLT surgery (left). Quantitative  
54 analysis of structural parameters of subchondral bone including Trabecular pattern  
55 factor (Tb.Pf), Trabecular separation (Tb.Sp), Percent bone volume (BV/TV) are  
56 presented alongside. Error bars are mean  $\pm$ s.d. Two-way ANOVA followed by Tukey's  
57 t-tests.  $n = 6$  for each group. Scale bars, 1 mm (microCT), 50  $\mu\text{m}$  (H&E) and 50  $\mu\text{m}$   
58 (S.O.).

59 (C) Representative images for IHF staining of ColX (red), and IHC staining of Mmp13  
60 in articular cartilage from *EP4<sup>fl/fl</sup>* or littermate *EP4<sup>LysM</sup>* mice 8 weeks post ACLT surgery  
61 (left), and quantitative analysis (right). Scale bars, 20  $\mu\text{m}$ . Error bars are mean  $\pm$ s.d.  
62 Two-way ANOVA followed by Tukey's t-tests.  $n = 3$  for each group. Scale bars, 20  $\mu\text{m}$ .

63

64 **Supplemental Figure 4. Identification of a novel potent *EP4* antagonist HL-43 for**  
65 **PGE2-induced migration and osteoclast differentiation.**

66 (A) Screening of *EP4* antagonists on PGE2-induced osteoclast differentiation. BMMs

67 from WT mice were used to generate osteoclasts by stimulating with 10 ng/ml M-CSF  
68 and 50 ng/ml RANKL, 100 nM PGE2 and different EP4 specific antagonists for 5 days  
69 (left). The experiments were performed in three technical replicates. The chemical  
70 structure of HL-43 (right).

71 (B and C) The inhibitory effects of HL-43 on PGE2-induced osteoclast differentiation  
72 (B) and migration (C). Error bars are mean  $\pm$  s.d. The experiment was performed in  
73 three biological replicates. IC<sub>50</sub> values were calculated by GraphPad Prism 8.0 software.

74

75 **Supplemental Figure 5. EP4 antagonist HL-43 inhibits OA progression in a murine**  
76 **model of OA with low gastrointestinal toxicity (refer to Fig. 5).**

77 (A) Representative 3D reconstructed microCT images, hematoxylin and eosin (H&E)  
78 and Safranin O-Fast green (S.O.) staining of sagittal sections of articular cartilage from  
79 WT mice treated with celecoxib (30 mg/kg) or HL-43 (30 mg/kg) 2 weeks post ACLT  
80 surgery (left). Quantitative analysis of structural parameters of subchondral bone  
81 including Trabecular pattern factor (Tb.Pf), Trabecular separation (Tb.Sp), Percent  
82 bone volume (BV/TV) are presented alongside. Error bars are mean  $\pm$  s.d. \* $P < 0.05$ ,  
83 ns, not significant by one-way ANOVA followed by Tukey's t-tests.  $n = 4$  for each  
84 group. Scale bars, 1 mm (microCT), 50  $\mu$ m (H&E) and 50  $\mu$ m (S.O.).

85 (B) Representative 3D reconstructed microCT images of knee joint, IHF for ColX, and  
86 IHC for Mmp13 from WT mice treated with indicated celecoxib (30 mg/kg) or HL-43  
87 (30 mg/kg) 8 weeks post ACLT surgery. microCT,  $n = 17$  for SHAM group,  $n = 21$  for  
88 vehicle treated group,  $n = 18$  for celecoxib treated group,  $n = 18$  for HL-43 treated

89 group. Quantitative analysis for IHF of ColX and IHC of Mmp13 (right),  $n = 3$  for each  
90 group. Error bars are mean  $\pm$  s.d.  $**P < 0.01$  and  $***P < 0.001$ , ns, not significant by  
91 one-way ANOVA followed by Tukey's t-tests. Scale bars, 1 mm (microCT), 20  $\mu$ m  
92 (IHF and IHC).

93 (C) Representative H&E staining of stomach sections from WT mice treated with  
94 celecoxib (30 mg/kg) or HL-43 (30 mg/kg) 8 weeks post ACLT surgery. Scale bars, 50  
95  $\mu$ m.

96 (D) The toxicity of celecoxib and HL-43 in BMMs and BMSCs. Primary BMMs or  
97 BMSCs were treated with indicated concentrations of celecoxib or HL-43 for 48 hour  
98 and cell viability was examined using the cell proliferation assay kit.  $IC_{50}$  values were  
99 calculated by GraphPad Prism 8.0 software. The experiment was performed in three  
100 biological replicates.

101

102 **Supplemental Figure 6. Differential phosphoprotein expression between  $EP4^{LysM}$**   
103 **and  $EP4^{fl/fl}$  osteoclast cells using the phosphoproteome antibody array.**

104 BMMs from  $EP4^{LysM}$  and  $EP4^{fl/fl}$  mice were used to generate osteoclasts by using 10  
105 ng/ml M-CSF and 50 ng/ml RANKL, and incubated with 100 nM PGE2 for 3 hours.

106 Subsequently, the cell lysates were used to detect phosphorylated proteins with an  
107 antibody array. The levels of the individual proteins were normalized to total protein  
108 levels, and differentially regulated proteins were subjected to KEGG pathway  
109 enrichment analysis.

110

111 **Supplemental Figure 7. PGE2 regulates migration and osteoclast differentiation**  
112 **through ATK/MAPK signalling, and PDGF-BB expression via NF- $\kappa$ B signalling.**

113 (A) AKT inhibitor GSK2141795 inhibited PGE2 induced migration and osteoclast  
114 differentiation. BMMs from WT were used to generate osteoclasts by stimulating with  
115 10 ng/ml M-CSF, 50 ng/ml RANKL and 100nM PGE2, with or without GSK2141795  
116 (10  $\mu$ M). Representative image of cells from transwell migration assay (Transwell), and  
117 osteoclasts differentiation assay (TRAP staining) (top), and the corresponding  
118 quantitative analysis (bottom). Error bars are mean  $\pm$  s.d. \* $P$  < 0.05 and \*\* $P$  < 0.01 by  
119 one-way ANOVA followed by Tukey's t-tests. Scale bars, 50  $\mu$ m. The experiment was  
120 performed in three biological replicates.

121 (B) Representative images of indicated protein expression by western blotting for  
122 osteoclasts generated using BMMs from WT mice, and treated with or without PGE2  
123 and AKT inhibitor GSK2141795 for 3 hours. The experiment was performed in three  
124 biological replicates.

125 (C) Representative images of migration and osteoclast differentiation in using BMMs  
126 from WT mice stimulated with 10 ng/ml M-CSF and 50 ng/ml RANKL. The cells were  
127 treated with different MAPKs inhibitors (AZD6244: 10  $\mu$ M, JNK-IN-8: 1  $\mu$ M and  
128 SB203580: 2  $\mu$ M), with or without PGE2 stimulation. Graphs from the image analyses  
129 are presented underneath. Error bars are mean  $\pm$  s.d. \* $P$  < 0.05, \*\* $P$  < 0.01 and \*\*\* $P$  <  
130 0.001 by one-way ANOVA followed by Tukey's t-tests. Scale bars, 50  $\mu$ m. The  
131 experiment was performed in three biological replicates.

132 (D) Representative image of western blotting of PDGF-BB in primary osteoclasts

133 generated from WT BMMs. The BMMs were stimulated with either 10 ng/ml M-CSF,  
134 50 ng/ml RANKL osteoclastogenic media alone, or with PGE2 (100 nM), or with PGE 2  
135 and Neferine (5  $\mu$ M; NF- $\kappa$ B inhibitor) for 3 days. The experiment was performed in  
136 three biological replicates.

137 **Supplemental Figure 8. Whole gel images for western blots.**

# Jiang et al., Supplemental Fig. 1

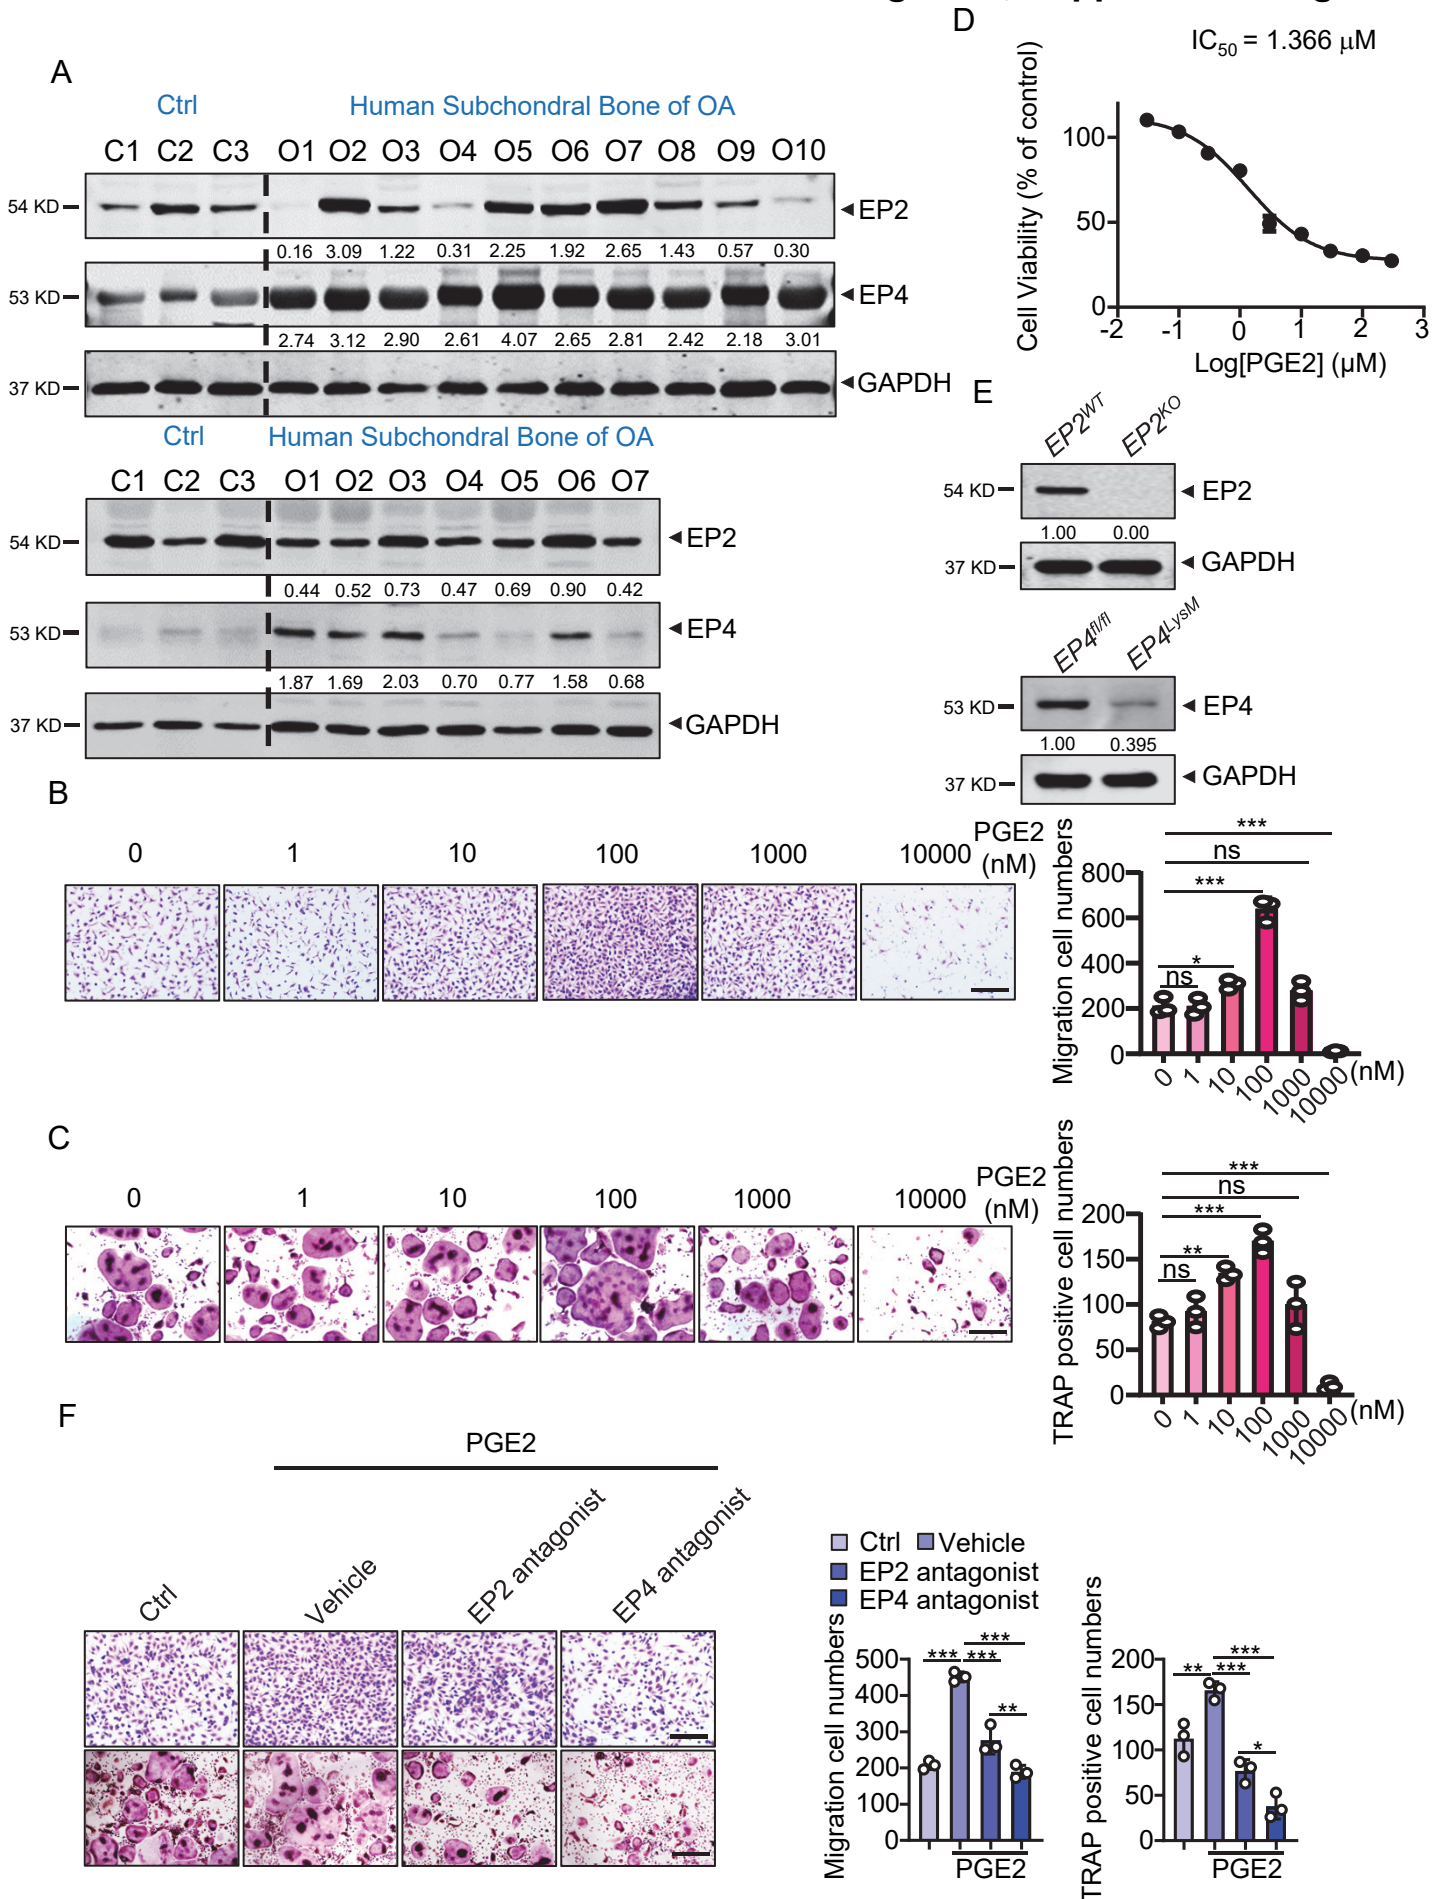



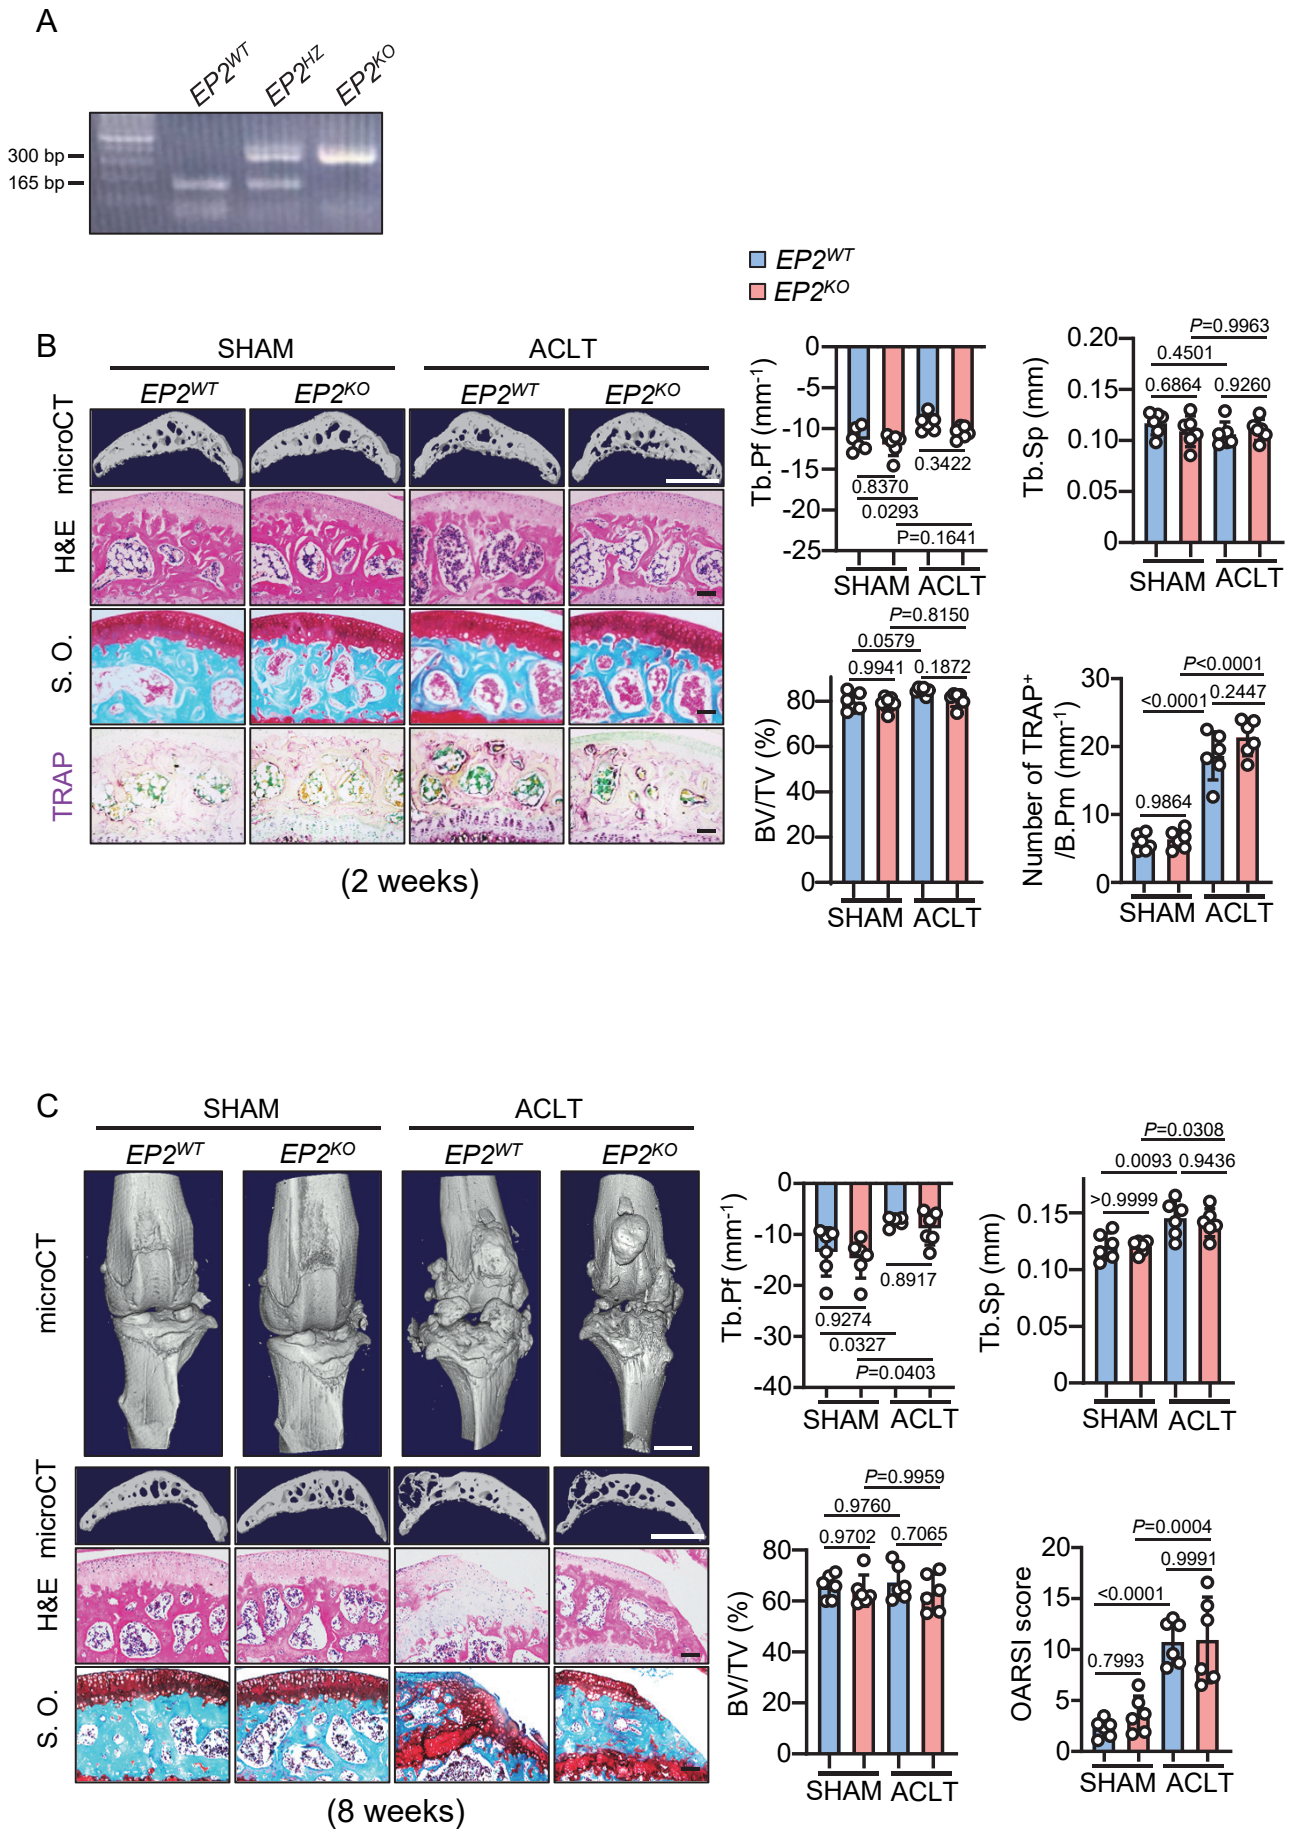

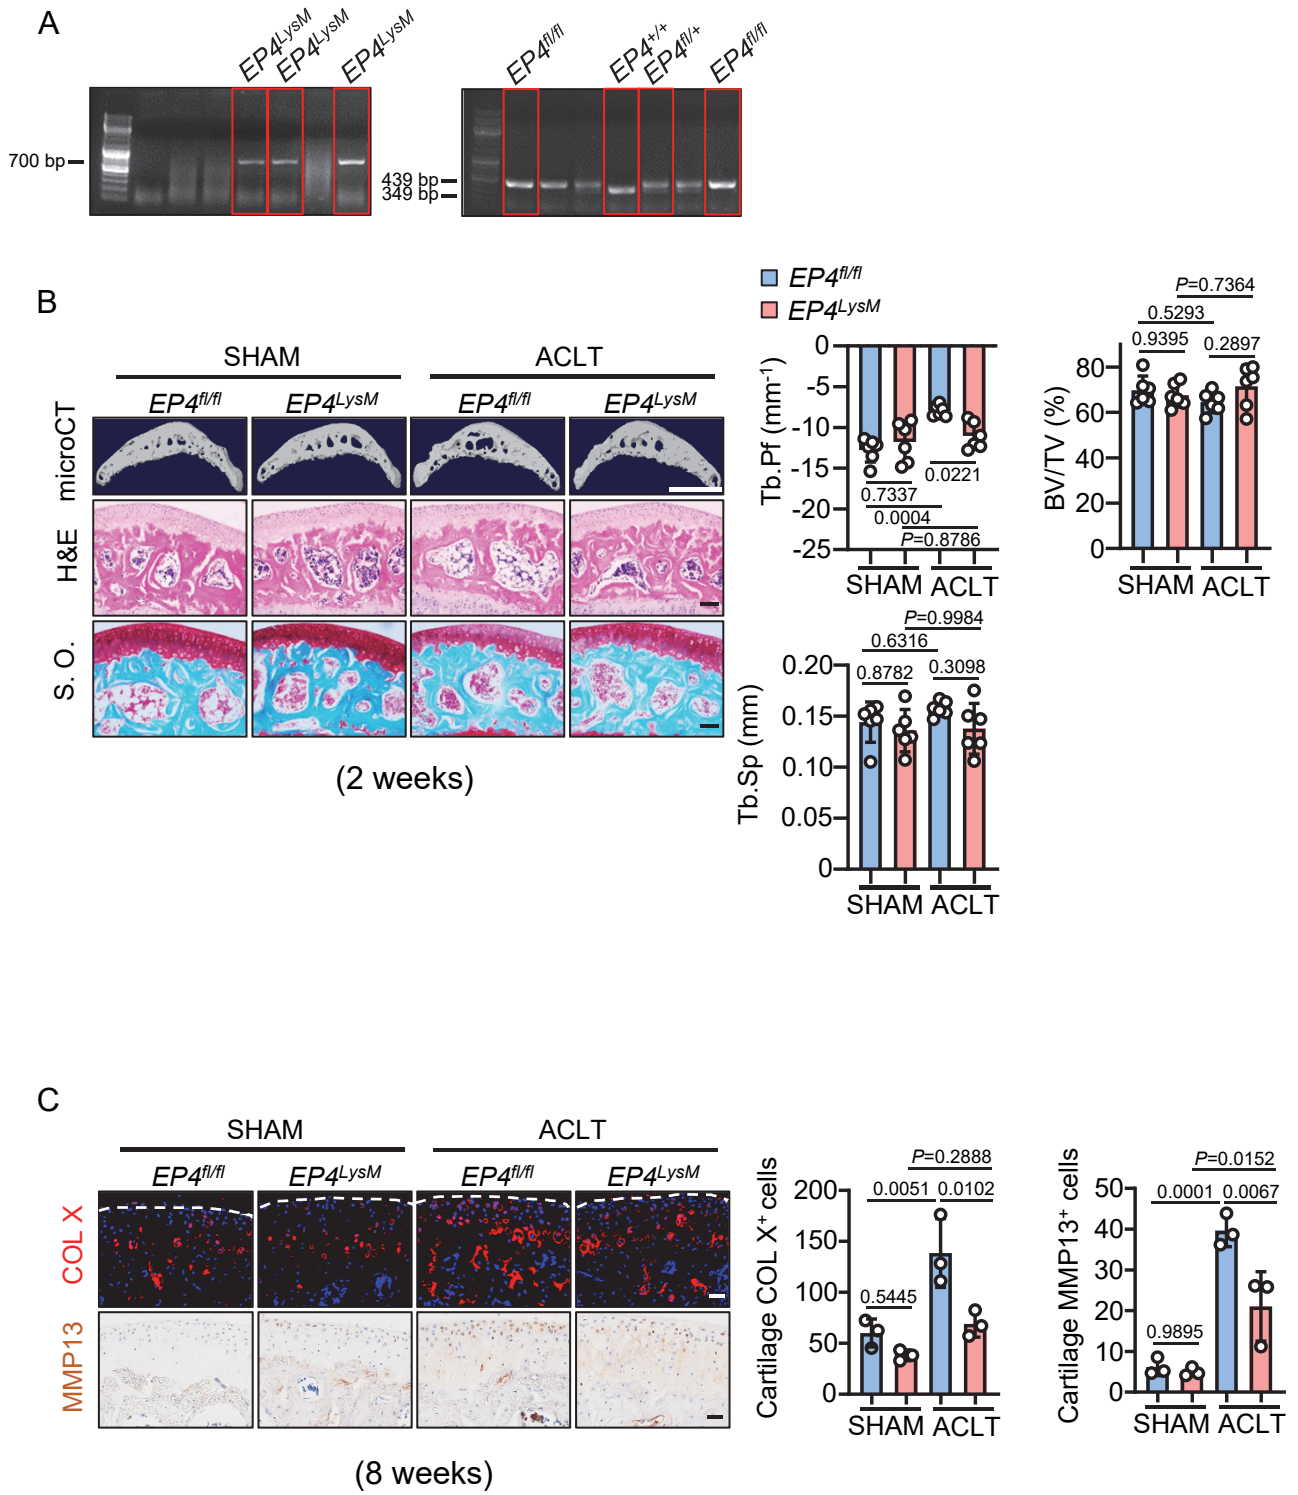



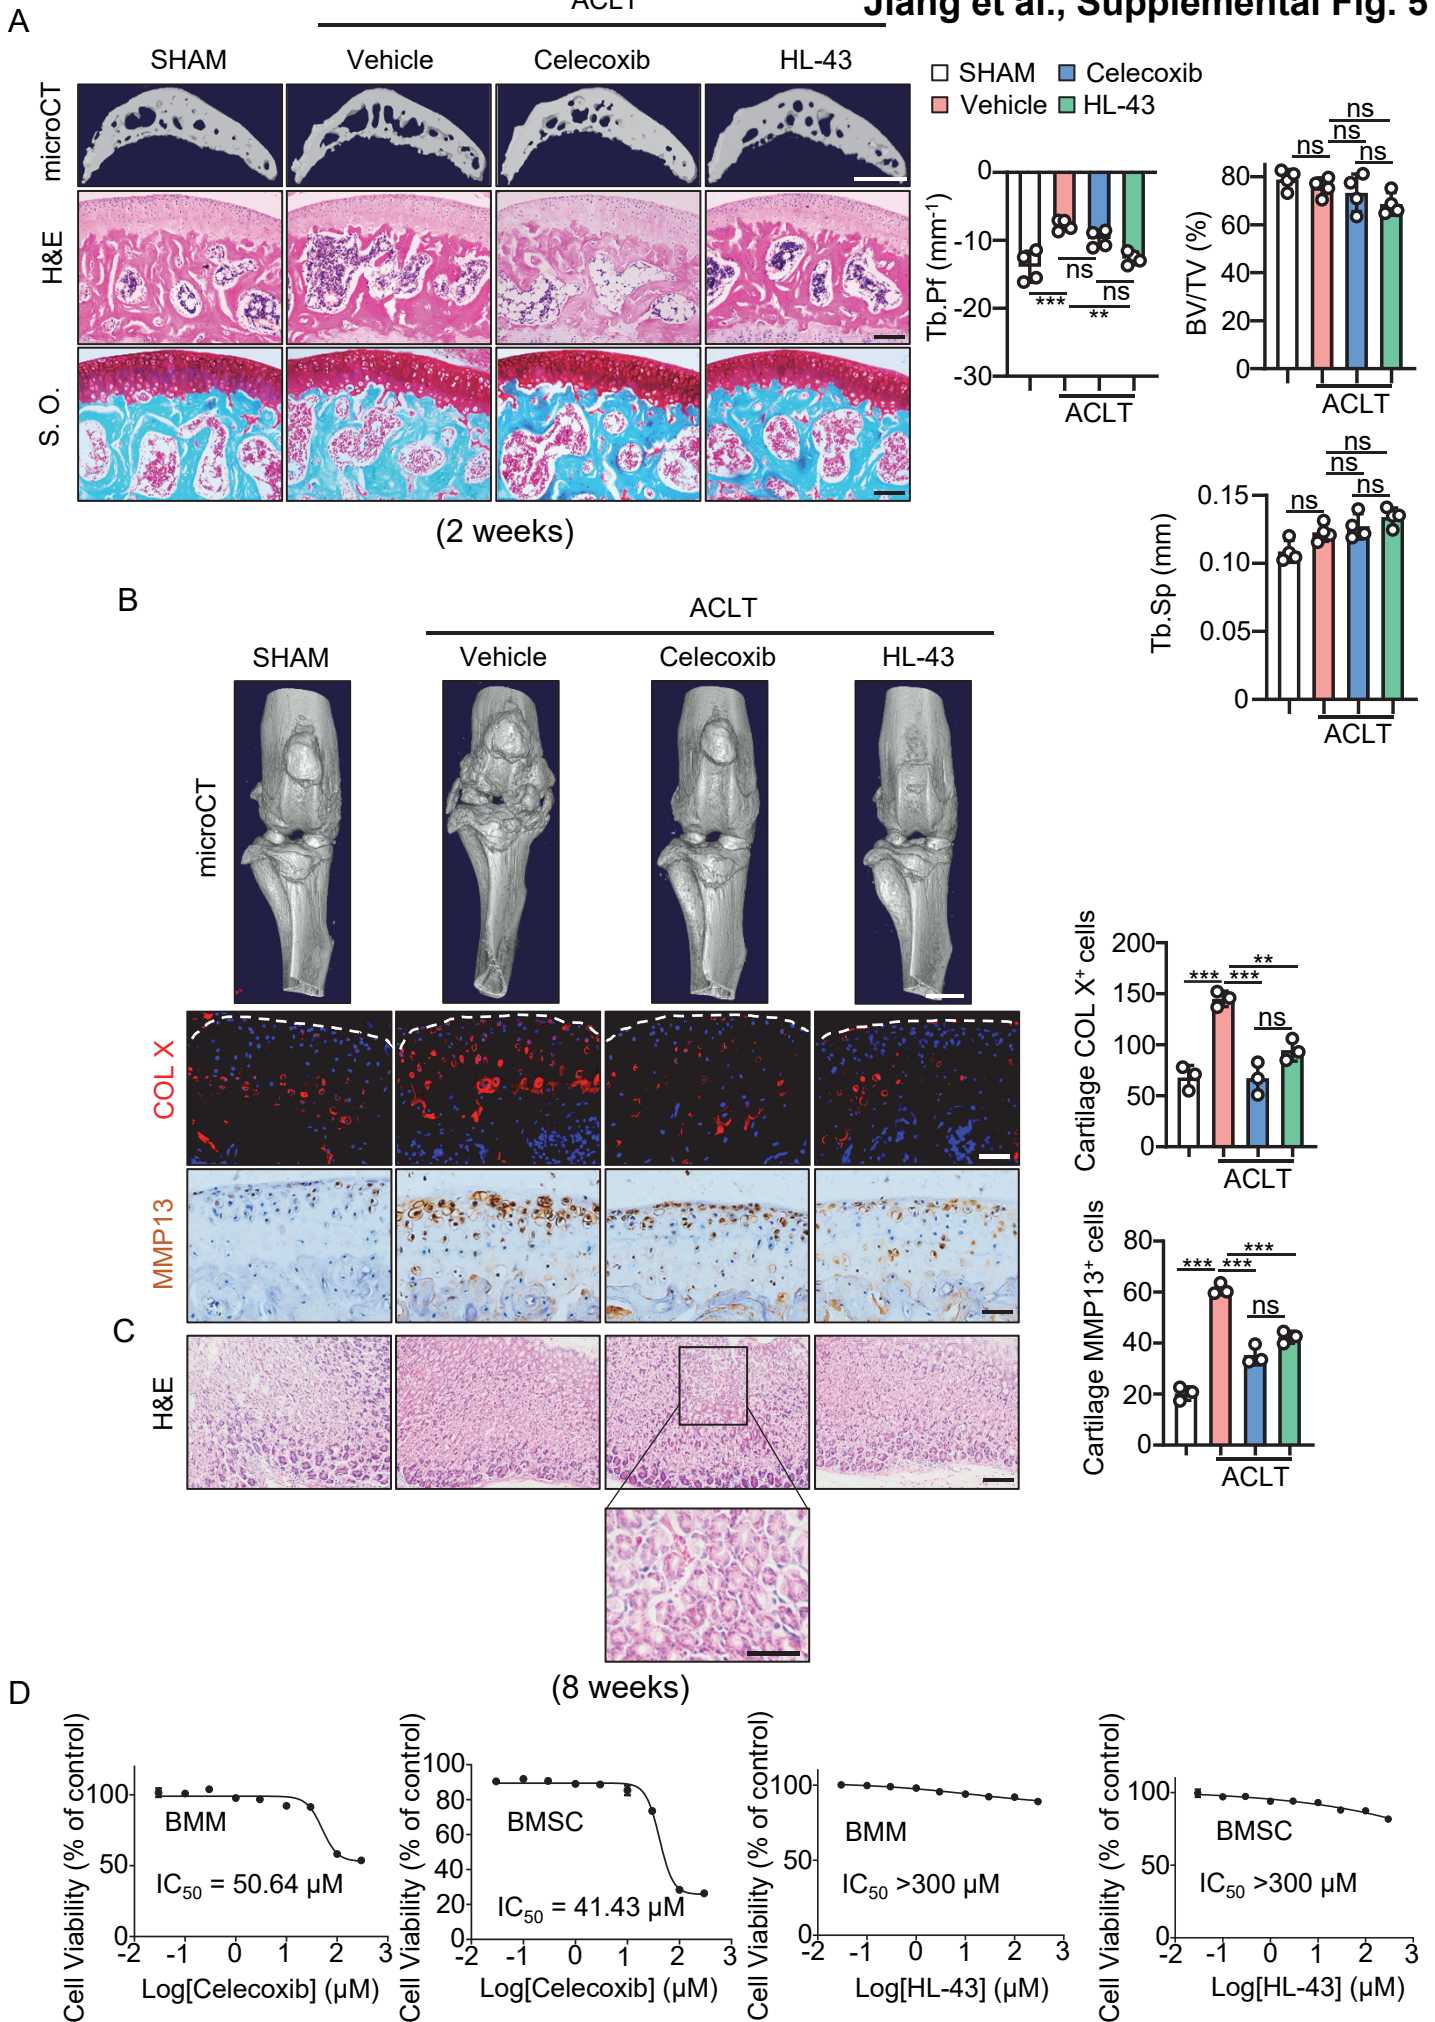

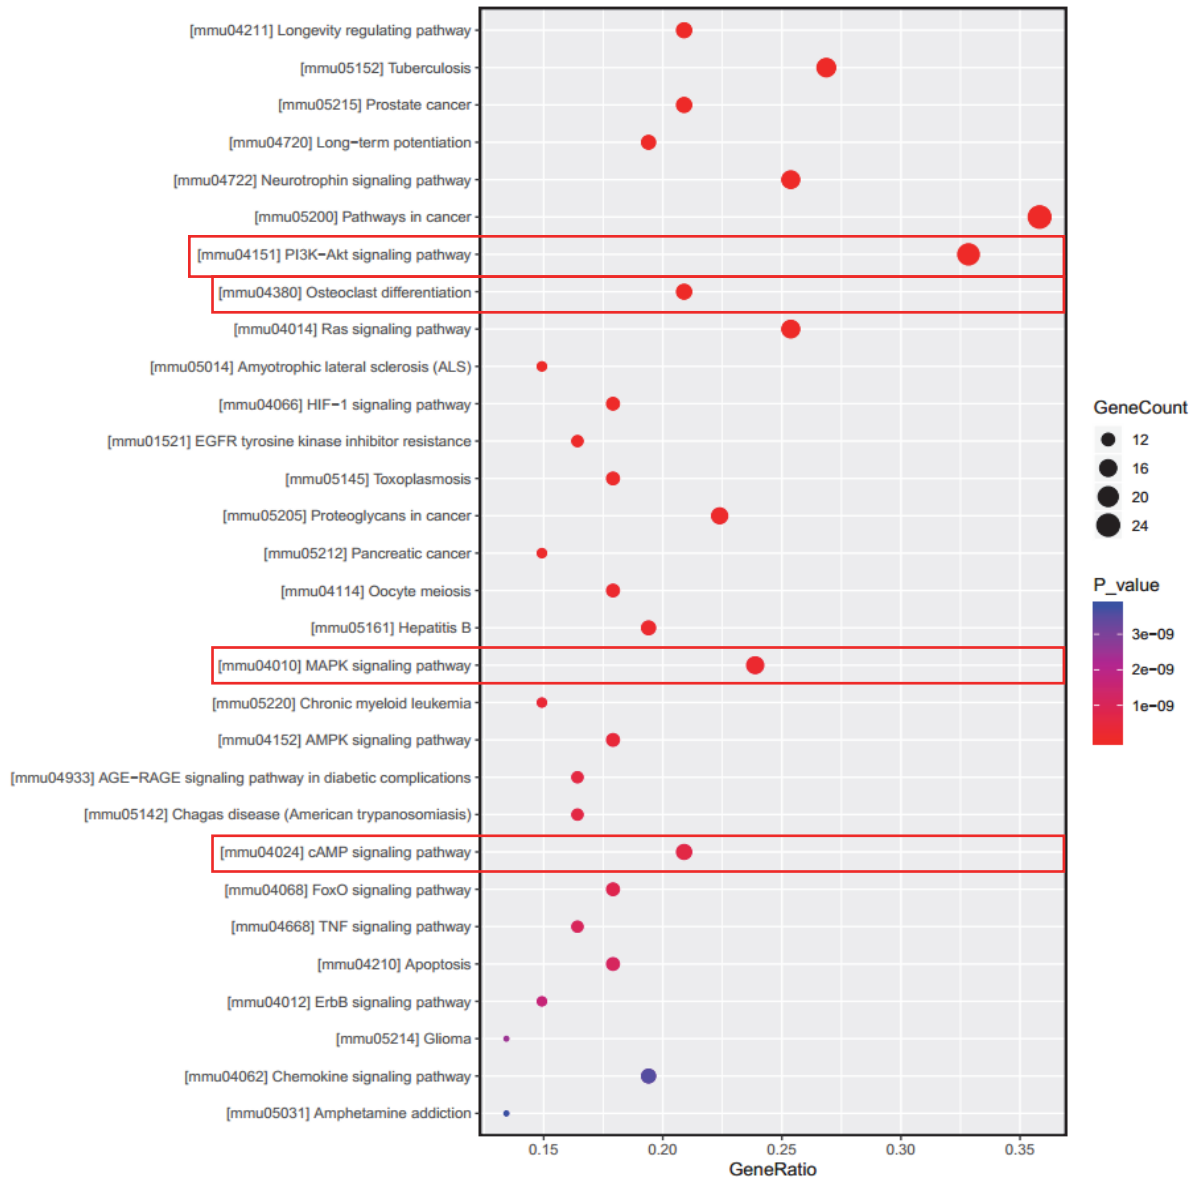

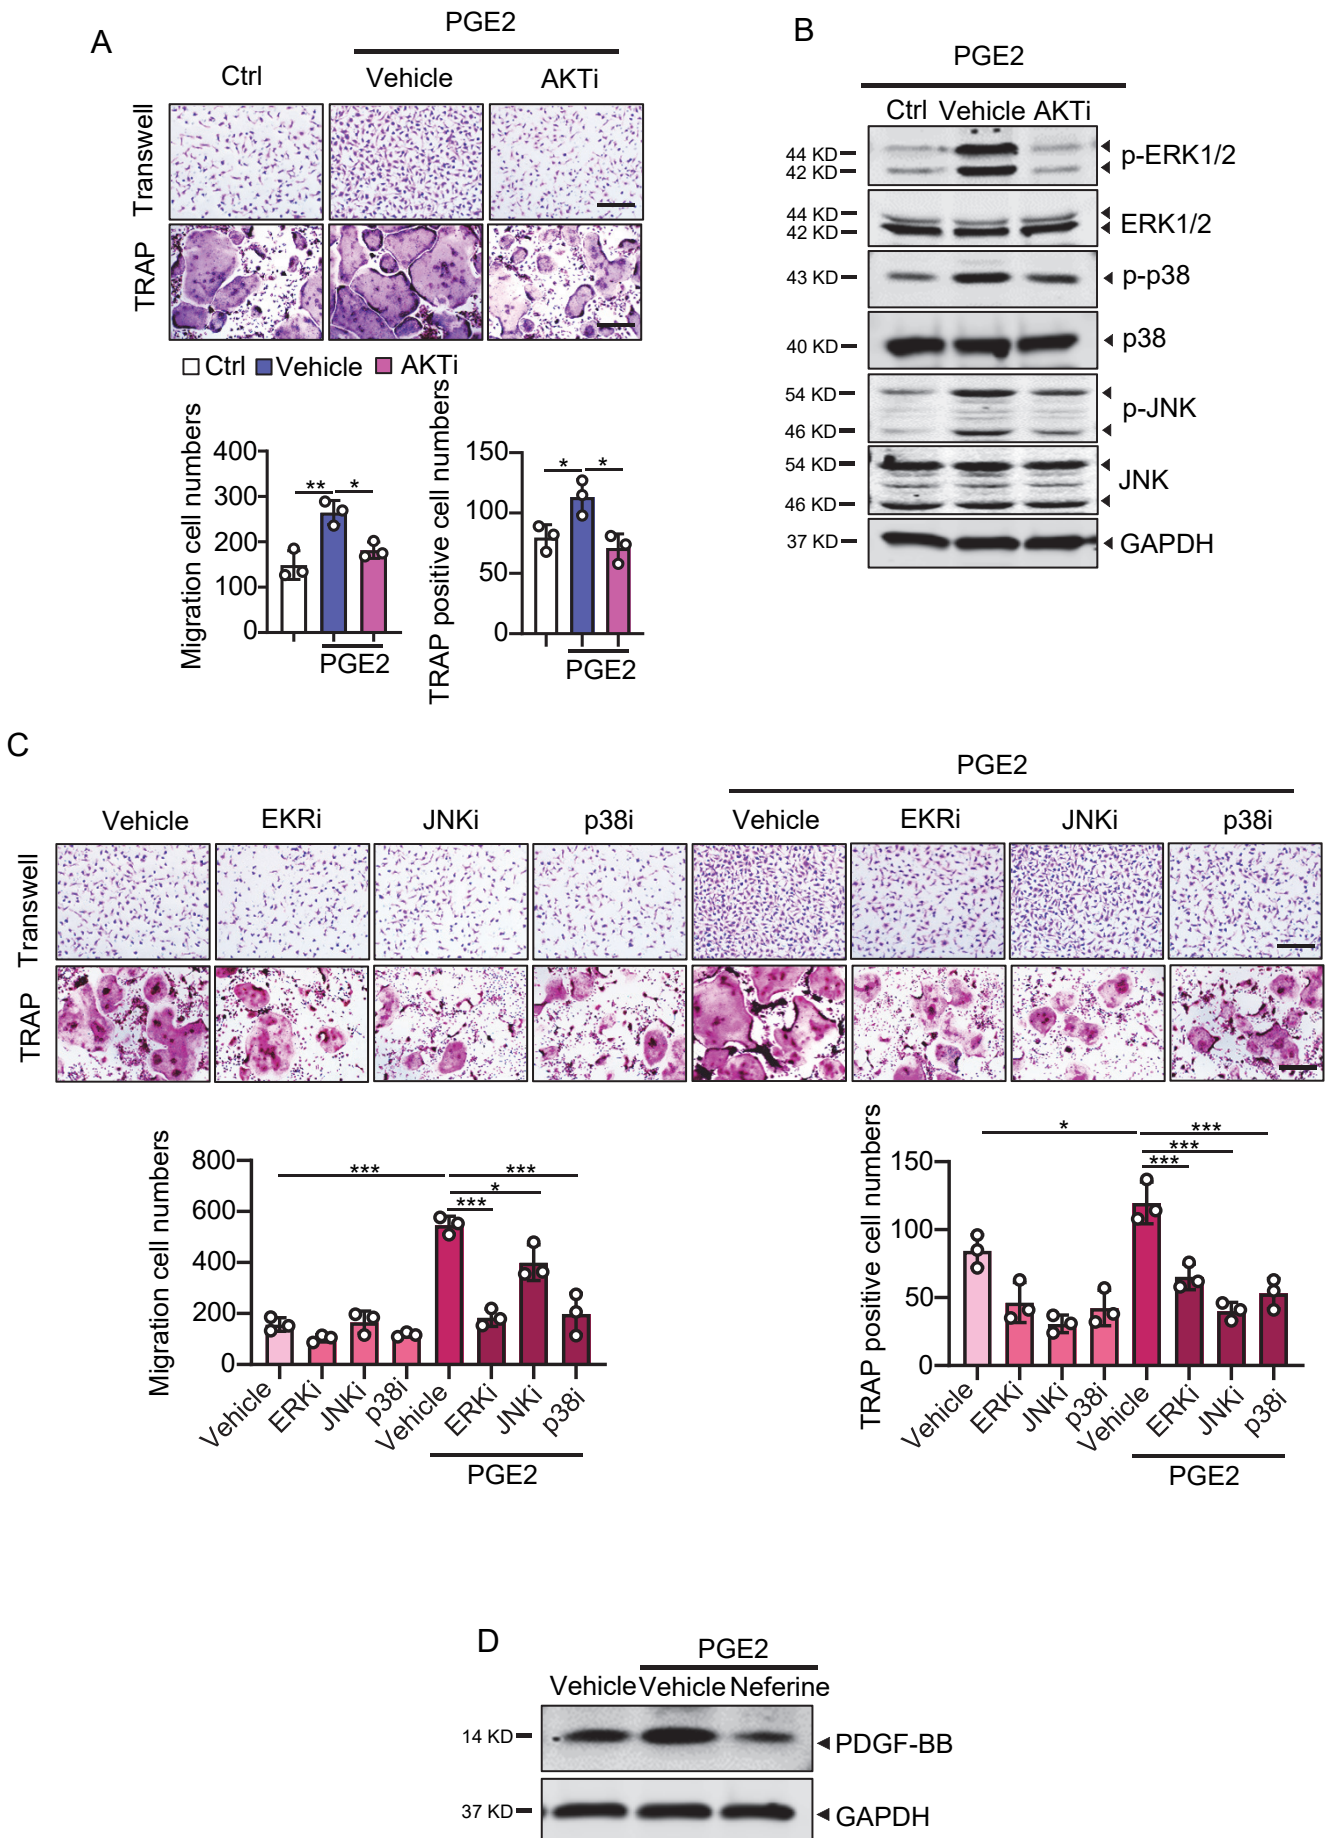

Jiang et al., Supplemental Fig. 8

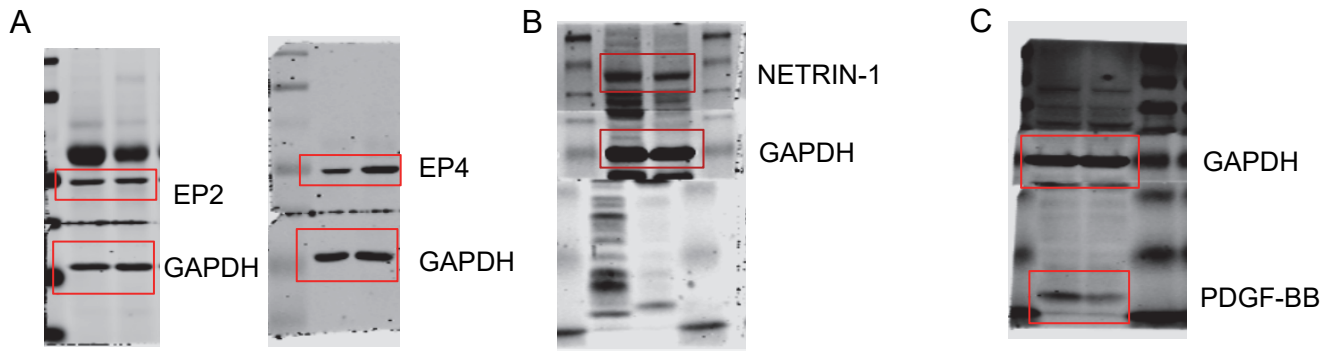

Full unedited gel for Figure 1B

Full unedited gel for Figure 3D

Full unedited gel for Figure 4C

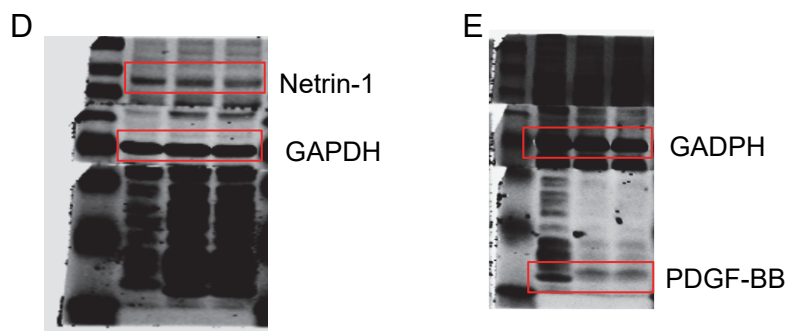

Full unedited gel for Figure 6D

Full unedited gel for Figure 7C

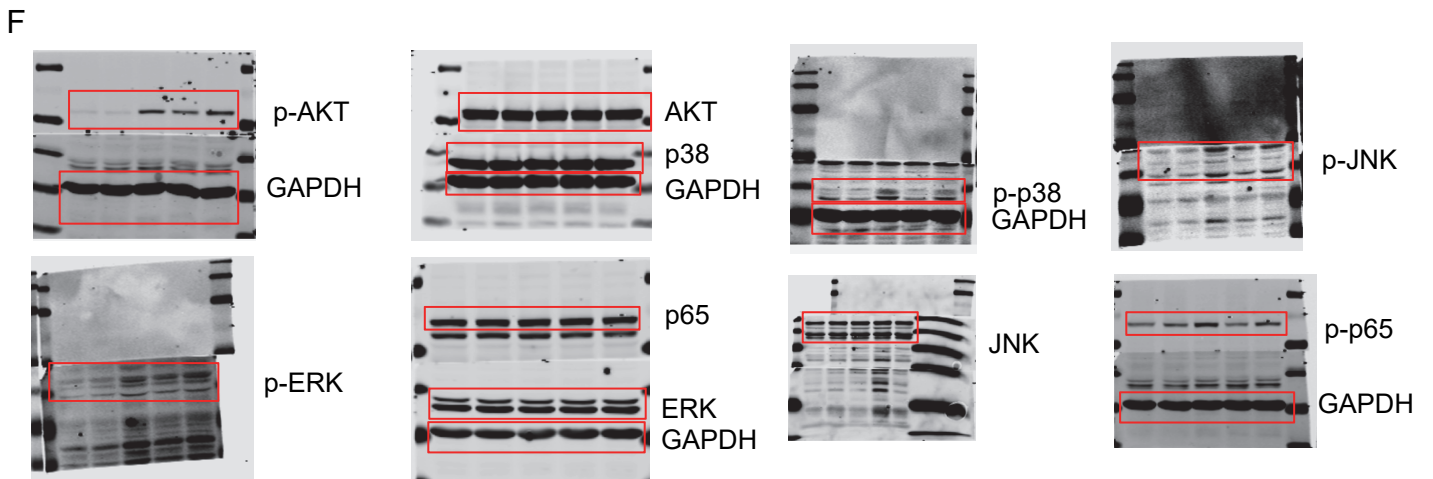

Full unedited gel for Figure 8E

G

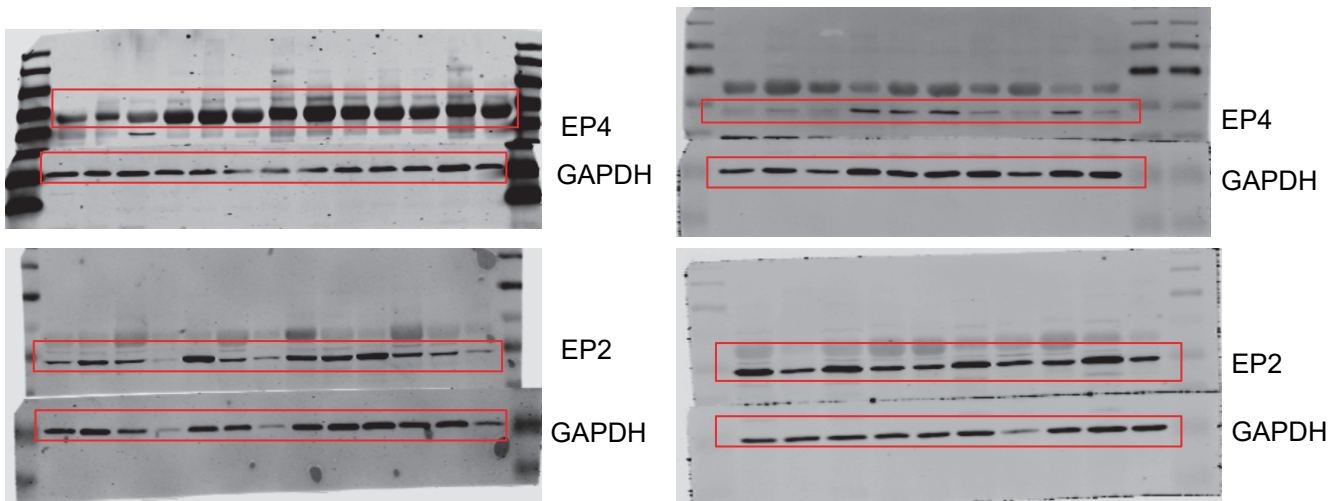

Full unedited gel for Supplemental Fig. 1D

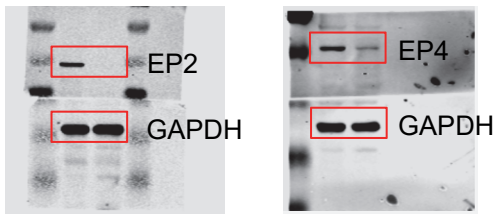

Full unedited gel for Supplemental Fig. 1E

H

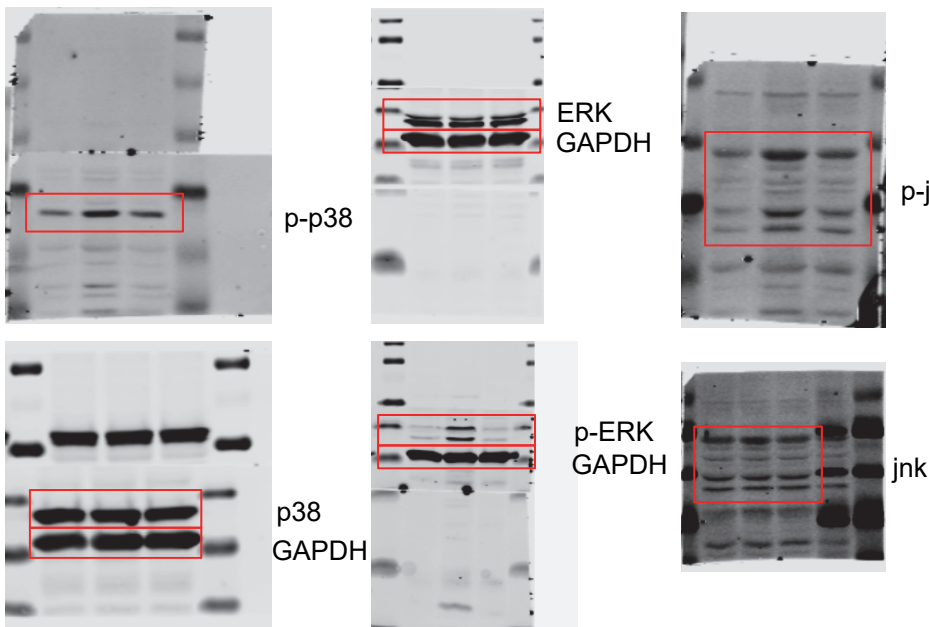

Full unedited gel for Supplemental Fig. 7B

I

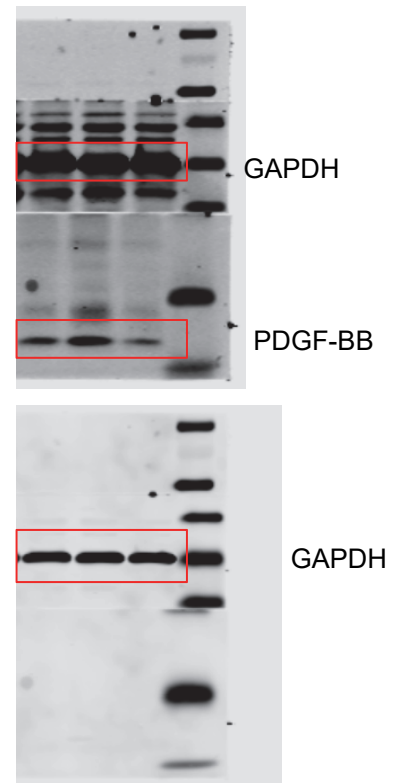

Full unedited gel for Supplemental Fig. 7D
